# Supplementary material for: Evaluations of dyadic synchrony: observers’ traits influence estimation and enjoyment of synchrony in mirror-game movements
Source: PubMed Central journal article supplement (PMC10844651; doi:10.1038/s41598-024-53191-0), 2024-02-05

## SUPPLEMENTARY MATERIALS

### Evaluations of dyadic synchrony: Observers' traits influence estimation and enjoyment of synchrony in mirror-game movements

#### Section 1 – Descriptive statistics and parameter estimates

**Supplementary Table 1:** Descriptive statistics for interindividual measures. See Figure 1A in main manuscript for depiction of distributions. SD = standard deviation.

| Measure         | Experiment 1 |       | Experiment 2 |       |
|-----------------|--------------|-------|--------------|-------|
|                 | Mean         | SD    | Mean         | SD    |
| Extraversion    | 30.61        | 7.90  | 30.89        | 6.80  |
| Self-Esteem     | 18.39        | 5.35  | 17.80        | 3.79  |
| Body Perception | 66.57        | 19.07 | 65.39        | 17.38 |
| Body Competence | 9.40         | 3.39  | 9.11         | 2.76  |
| Empathy         | 69.65        | 13.78 | 70.32        | 11.88 |
| Autistic Traits | 113.63       | 26.27 | 109.43       | 22.10 |

**Supplementary Table 2:** Parameter estimates for Accuracy (measured movement similarity - estimated movement similarity) overall, as well as for low and high synchrony. HPD = 95% highest posterior density region.

| Synchrony | Experiment 1 |              | Experiment 2 |              |
|-----------|--------------|--------------|--------------|--------------|
|           | Estimate     | HPD          | Estimate     | HPD          |
| Mean      | 28.30        | 26.90, 29.70 | 26.90        | 25.40, 28.40 |
| Low       | 43.00        | 41.30, 44.70 | 42.60        | 40.82, 44.40 |
| High      | 13.60        | 12.30, 15.00 | 11.30        | 9.84, 12.70  |

**Supplementary Table 3:** Relationship between accuracy and measured predictability and similarity of movements, per degree of synchrony. HPD = 95% highest posterior density region.

| Measure         | Synchrony | Experiment 1 |              | Experiment 2 |              | Experiment 1+2 |              |
|-----------------|-----------|--------------|--------------|--------------|--------------|----------------|--------------|
|                 |           | Estimate     | HPD          | Estimate     | HPD          | Estimate       | HPD          |
| Predictability  | Low       | -1.17        | -2.37, -0.02 | -2.61        | -3.78, -1.41 | -1.93          | -2.77, -1.10 |
|                 | High      | 1.05         | 0.60, 1.50   | 0.32         | -0.12, 0.76  | 0.69           | 0.38, 1.02   |
| Enjoyment       | Low       | 1.30         | 0.20, 2.41   | -0.23        | -1.36, 0.92  | -0.58          | -0.23, 1.37  |
|                 | High      | -2.31        | -2.96, -1.69 | -2.58        | -3.22, 1.97  | -2.46          | -2.90, -2.00 |
| Reproducibility | Low       | 0.43         | -0.66, 1.49  | 2.22         | 1.01, 3.47   | 1.38           | 0.53, 2.18   |
|                 | High      | -1.37        | -2.05, -0.70 | -2.01        | -2.69, -1.28 | -1.65          | -2.16, -1.17 |

**Supplementary Table 4:** Relationship between accuracy and interindividual measures, per degree of synchrony. HPD = 95% highest posterior density region.

| Measure         | Synchrony | Experiment 1 |              | Experiment 2 |             | Experiment 1+2 |              |
|-----------------|-----------|--------------|--------------|--------------|-------------|----------------|--------------|
|                 |           | Estimate     | HPD          | Estimate     | HPD         | Estimate       | HPD          |
| Extraversion    | Low       | 1.02         | -0.61, 2.69  | -0.17        | -2.03, 1.74 | -0.87          | -2.34, 0.56  |
|                 | High      | 0.86         | -0.51, 2.16  | 0.74         | -0.77, 2.33 | 0.55           | -0.64, 1.77  |
| Self-esteem     | Low       | -0.91        | -2.70, 0.86  | -2.38        | -4.46, 0.21 | -0.91          | -2.51, 0.67  |
|                 | High      | 0.38         | -1.08, 1.79  | -0.81        | -2.56, 0.96 | -0.12          | -1.44, 1.17  |
| Body Perception | Low       | -1.41        | -3.00, 0.79  | -1.01        | -2.96, 0.89 | -0.90          | -2.31, 0.57  |
|                 | High      | -0.42        | -1.91, 1.17  | -0.16        | -1.41, 1.75 | 0.10           | -1.11, 1.29  |
| Body Competence | Low       | -1.77        | -3.48, -0.12 | -1.46        | -3.28, 0.47 | -1.49          | -2.85, -0.07 |
|                 | High      | 0.33         | -1.07, 1.68  | 0.28         | -1.23, 1.85 | 0.34           | -0.82, 1.50  |
| Empathy         | Low       | 0.57         | -1.29, 2.44  | 0.69         | -1.17, 2.53 | 0.56           | -0.77, 1.91  |
|                 | High      | 0.79         | -0.77, 2.30  | -0.93        | -2.41, 0.58 | -0.69          | -1.81, 0.42  |
| Autistic Traits | Low       | 1.00         | -1.08, 2.96  | -2.46        | -4.63, 0.32 | -0.87          | -2.49, 0.68  |
|                 | High      | 0.79         | -0.85, 2.47  | 1.12         | -0.69, 2.87 | 1.37           | 0.07, 2.72   |

**Supplementary Table 5:** Relationship between very low enjoyment and interindividual measures. HPD = 95% highest posterior density region. For Experiment 1+2: 10 % of HPD for body perception is above 0.

| Measure                | Very low enjoyment (0-10/100) |              |              |              |                |              |
|------------------------|-------------------------------|--------------|--------------|--------------|----------------|--------------|
|                        | Experiment 1                  |              | Experiment 2 |              | Experiment 1+2 |              |
|                        | Estimate                      | HPD          | Estimate     | HPD          | Estimate       | HPD          |
| <b>Extraversion</b>    | -0.20                         | -0.26, -0.14 | -0.11        | -0.18, -0.04 | -0.07          | -0.12, -0.02 |
| <b>Self-Esteem</b>     | 0.15                          | 0.08, 0.22   | -0.34        | -0.43, -0.27 | -0.31          | -0.36, -0.25 |
| <b>Body Percep.</b>    | 0.31                          | 0.23, 0.38   | -0.08        | -0.16, -0.01 | 0.10           | 0.05, 0.15   |
| <b>Body Compet.</b>    | 0.11                          | 0.05, 0.17   | -0.32        | -0.38, -0.25 | -0.04          | -0.09, 0.01  |
| <b>Empathy</b>         | -0.17                         | -0.24, -0.10 | 0.06         | -0.01, 0.13  | -0.08          | -0.12, -0.03 |
| <b>Autistic Traits</b> | -0.24                         | -0.33, -0.17 | -0.34        | -0.42, -0.26 | -0.28          | -0.33, -0.22 |
| <b>Similarity</b>      | -0.04                         | -0.10, 0.22  | -0.08        | -0.15, -0.02 | -0.05          | -0.10, -0.01 |
| <b>Predictability</b>  | 0.05                          | -0.01, 0.11  | 0.00         | -0.07, 0.06  | 0.02           | -0.02, 0.06  |

**Supplementary Table 6:** Relationship between enjoyment per se and interindividual measures. HPD = 95% highest posterior density region. Experiment 1+2: for enjoyment per se, 5% of empathy HPD is below 0. Body Compet. = Body competence; Body Percep. = Body perception.

| Measure                | Enjoyment per se (11-100/100) |             |              |              |                |              |
|------------------------|-------------------------------|-------------|--------------|--------------|----------------|--------------|
|                        | Experiment 1                  |             | Experiment 2 |              | Experiment 1+2 |              |
|                        | Estimate                      | HPD         | Estimate     | HPD          | Estimate       | HPD          |
| <b>Extraversion</b>    | 2.23                          | 0.36, 4.00  | 0.02         | -1.76, 2.02  | 0.48           | -1.07, 2.01  |
| <b>Self-Esteem</b>     | 0.38                          | -1.62, 2.25 | 2.87         | 0.68, 4.92   | 2.84           | 1.11, 4.59   |
| <b>Body Percep.</b>    | -1.07                         | -3.19, 1.09 | 2.65         | 0.70, 4.64   | 1.03           | -0.63, 2.62  |
| <b>Body Compet.</b>    | -0.81                         | -2.57, 1.06 | 2.81         | 0.94, 4.58   | 0.31           | -1.20, 1.81  |
| <b>Empathy</b>         | 1.70                          | -0.36, 3.68 | 2.03         | 0.24, 3.85   | 1.29           | -0.15, 2.79  |
| <b>Autistic Traits</b> | -1.89                         | -4.10, 0.31 | -0.40        | -2.56, 1.78  | -0.80          | -2.60, 0.89  |
| <b>Similarity</b>      | 0.50                          | 0.06, 0.93  | 1.22         | 0.80, 1.67   | 0.86           | 0.56, 1.16   |
| <b>Predictability</b>  | -0.76                         | -1.19, 0.33 | -1.04        | -1.46, -0.62 | -0.90          | -1.20, -0.60 |

## Section 2 – Full models predicting accuracy and enjoyment of synchronous dyadic movements

**Supplementary Figure A)** Influence of enjoyment, reproducibility, and predictability on accuracy: Model comparison using LOO (leave-one-out cross-validation). In both experiments, H4.0 is the worst model. Error bars for all other models overlap greatly, suggesting that no model offers uniquely better predictive accuracy.  $elpd\_loo$  = expected log pointwise predictive density, a way of ranking models by predictive accuracy.

$simDif$  = objectively measured similarity – estimated similarity  
 $Moving$  = categorical variable high or low synchrony  
 $enjoyment\_z$  = z-scored ratings of enjoyment  
 $reproducibility\_z$  = z-scored ratings of reproducibility  
 $M\_entropy1\_z$  = z-scored and averaged entropy of right and left wrists

- H4.0:  $simDif \sim 1 + Moving, \sigma \sim Moving$
- H4.1:  $simDif \sim 1 + Moving + (1|ID), \sigma \sim Moving$
- H4.2:  $simDif \sim 1 + Moving + M\_entropy1\_z + (1|ID), \sigma \sim Moving$
- H4.3:  $simDif \sim 1 + Moving + enjoyment\_z + M\_entropy1\_z + (1|ID), \sigma \sim Moving$
- H4.4:  $simDif \sim 1 + Moving + enjoyment\_z + reproducibility\_z + M\_entropy1\_z + (1|ID), \sigma \sim Moving$
- H4.5:  $simDif \sim 1 + Moving * (enjoyment\_z) + reproducibility\_z + M\_entropy1\_z + (1|ID), \sigma \sim Moving$
- H4.6:  $simDif \sim 1 + Moving * (enjoyment\_z + reproducibility\_z) + M\_entropy1\_z + (1|ID), \sigma \sim Moving$
- H4.7:  $simDif \sim 1 + Moving * (enjoyment\_z + reproducibility\_z + M\_entropy1\_z) + (1|ID), \sigma \sim Moving$
- H4.8:  $simDif \sim 1 + Moving * (enjoyment\_z * reproducibility\_z + M\_entropy1\_z) + (1|ID), \sigma \sim Moving$

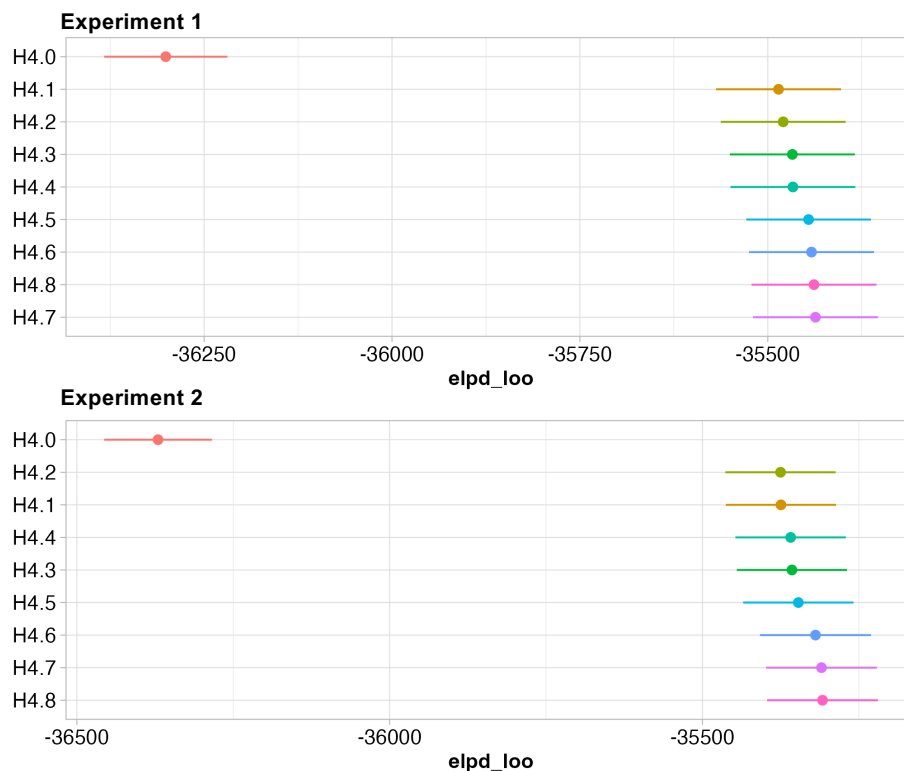

**Supplementary Figure B)** Influence of enjoyment, reproducibility, and predictability on accuracy: Parameter estimates from H4.8. Entropy is our measure of predictability, where greater positive values represent less predictability and smaller values represent a ‘more pure’, more predictable, signal.

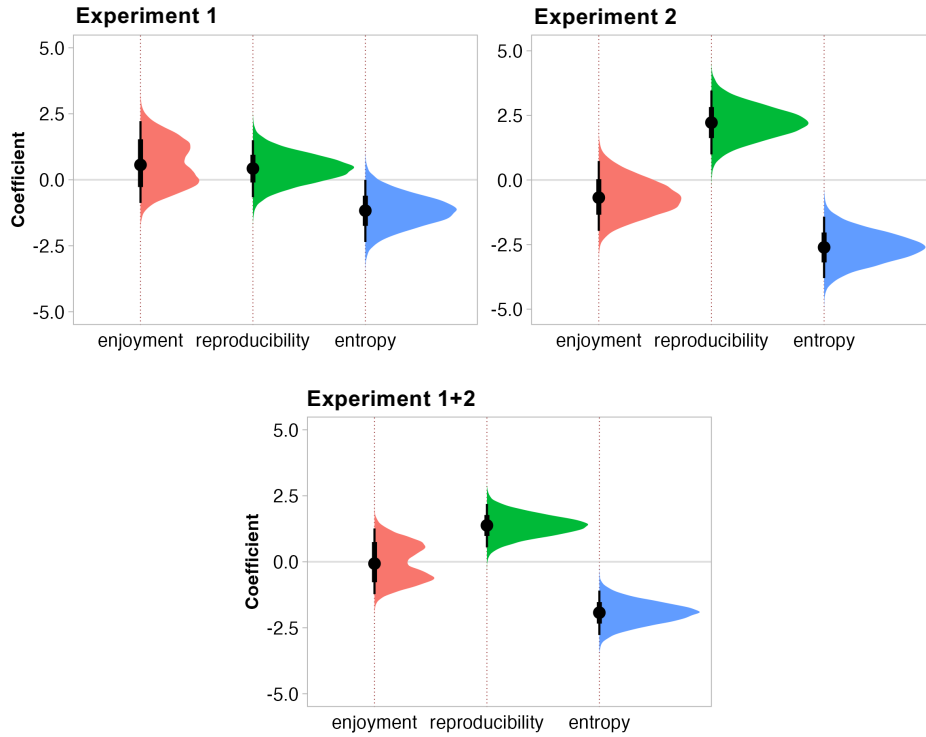

**Supplementary Figure C) Influence of interindividual traits and predictability on accuracy: Model comparison using LOO (leave-one-out cross-validation).** In both experiments, H3.0 is the worst model. Error bars for all other models overlap greatly, suggesting that no model offers uniquely better predictive accuracy.

elpd\_loo = expected log pointwise predictive density, a way of ranking models by predictive accuracy.

simDif = objectively measured similarity – estimated similarity  
 Moving = categorical variable high or low synchrony  
 extraversion\_z = z-scored extraversion score  
 selfEsteem\_z = z-scored selfesteem score  
 bpq\_z = z-scored body perception score  
 bcq\_z = z-scored body competence score  
 iri\_z = z-scored empathy score  
 cati\_z = z-scored autistic trait score  
 M\_entropy1\_z = z-scored and averaged entropy of right and left wrists

- H3.0:  $simDif \sim 1 + Moving, \sigma \sim Moving$
- H3.1:  $simDif \sim 1 + Moving + (1|ID), \sigma \sim Moving$
- H3.2:  $simDif \sim 1 + Moving + M\_entropy1\_z + (1|ID), \sigma \sim Moving$
- H3.3:  $simDif \sim 1 + Moving + extraversion\_z + M\_entropy1\_z + (1|ID), \sigma \sim Moving$
- H3.4:  $simDif \sim 1 + Moving + extraversion\_z + selfEsteem\_z + M\_entropy1\_z + (1|ID), \sigma \sim Moving$
- H3.5:  $simDif \sim 1 + Moving + extraversion\_z + selfEsteem\_z + bpq\_z + M\_entropy1\_z + (1|ID), \sigma \sim Moving$
- H3.6:  $simDif \sim 1 + Moving + extraversion\_z + selfEsteem\_z + bpq\_z + bcq\_z + M\_entropy1\_z + (1|ID), \sigma \sim Moving$
- H3.7:  $simDif \sim 1 + Moving + extraversion\_z + selfEsteem\_z + bpq\_z + bcq\_z + iri\_z + M\_entropy1\_z + (1|ID), \sigma \sim Moving$
- H3.8:  $simDif \sim 1 + Moving + extraversion\_z + selfEsteem\_z + bpq\_z + bcq\_z + iri\_z + cati\_z + M\_entropy1\_z + (1|ID), \sigma \sim Moving$
- H3.9:  $simDif \sim 1 + Moving * (extraversion\_z) + selfEsteem\_z + bpq\_z + bcq\_z + iri\_z + cati\_z + M\_entropy1\_z + (1|ID), \sigma \sim Moving$
- H3.10:  $simDif \sim 1 + Moving * (extraversion\_z + selfEsteem\_z) + bpq\_z + bcq\_z + iri\_z + cati\_z + M\_entropy1\_z + (1|ID), \sigma \sim Moving$
- H3.11:  $simDif \sim 1 + Moving * (extraversion\_z + selfEsteem\_z + bpq\_z) + bcq\_z + iri\_z + cati\_z + M\_entropy1\_z + (1|ID), \sigma \sim Moving$
- H3.12:  $simDif \sim 1 + Moving * (extraversion\_z + selfEsteem\_z + bpq\_z + bcq\_z) + iri\_z + cati\_z + M\_entropy1\_z + (1|ID), \sigma \sim Moving$
- H3.13:  $simDif \sim 1 + Moving * (extraversion\_z + selfEsteem\_z + bpq\_z + bcq\_z + iri\_z) + cati\_z + M\_entropy1\_z + (1|ID), \sigma \sim Moving$
- H3.14:  $simDif \sim 1 + Moving * (extraversion\_z + selfEsteem\_z + bpq\_z + bcq\_z + iri\_z + cati\_z) + M\_entropy1\_z + (1|ID), \sigma \sim Moving$
- H3.15:  $simDif \sim 1 + Moving * (extraversion\_z + selfEsteem\_z + bpq\_z + bcq\_z + iri\_z + cati\_z + M\_entropy1\_z) + (1|ID), \sigma \sim Moving$

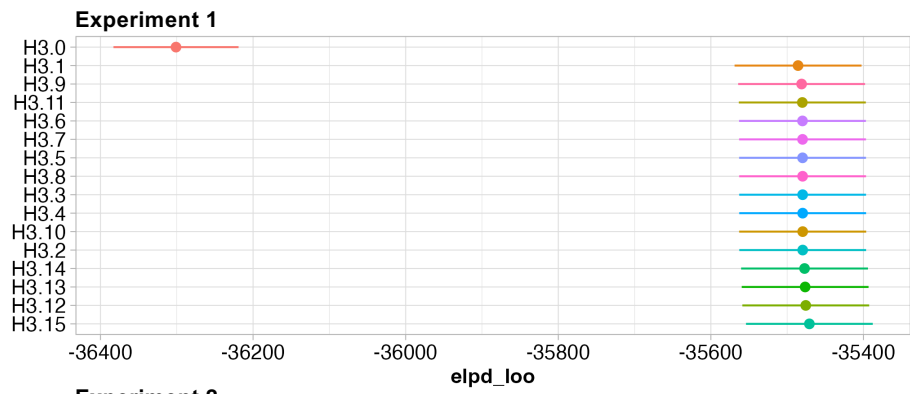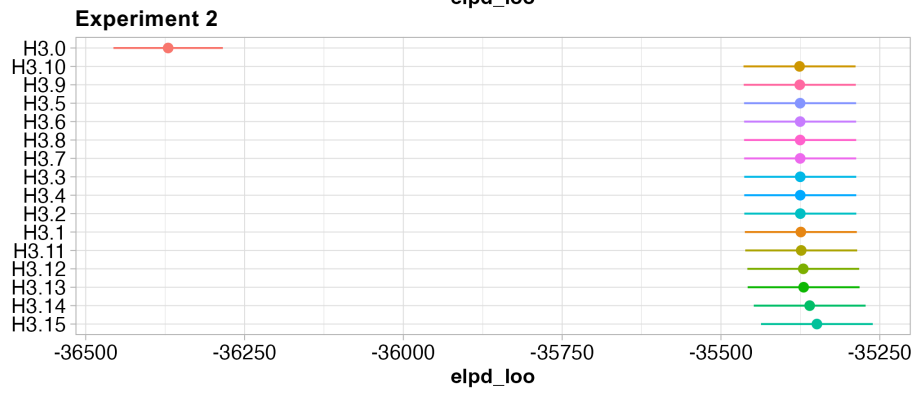

**Supplementary Figure D)** Influence of interindividual traits and predictability (i.e., entropy) on accuracy: Parameter estimates from H3.15. bpq = body perception; bcq = body competence; iri = empathy; cati = autistic traits.

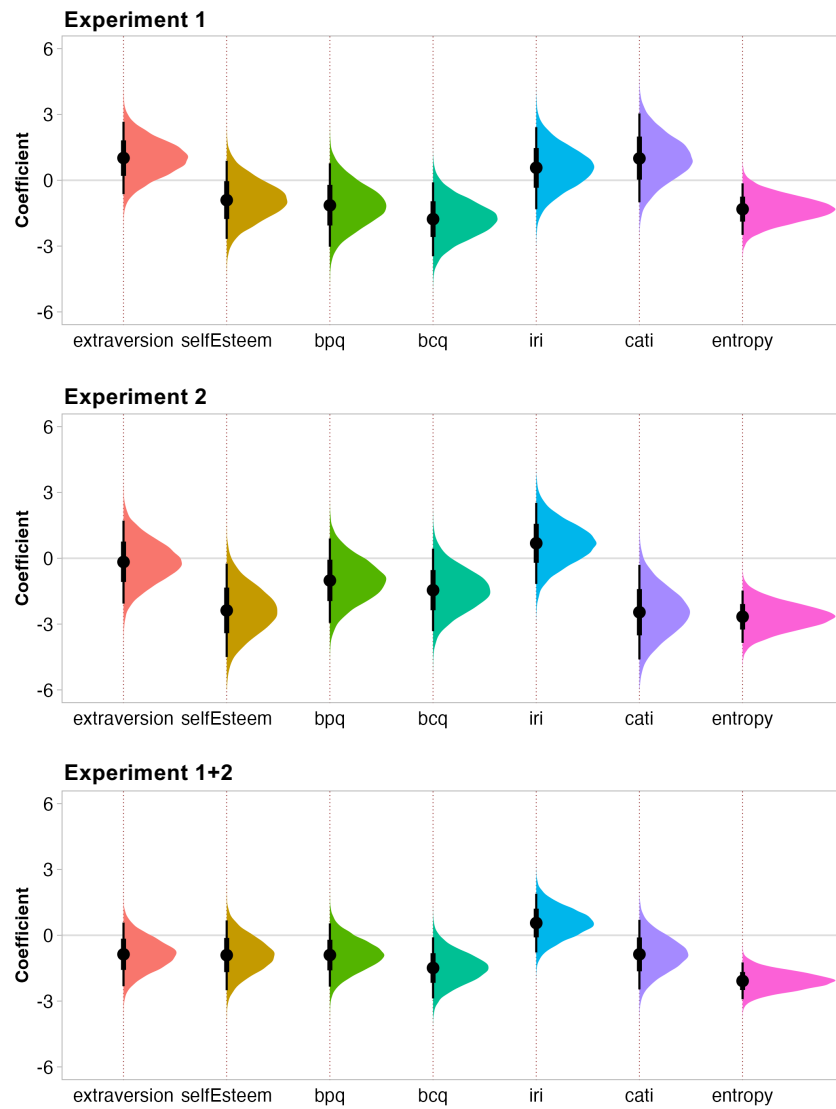

**Supplementary Figure E)** Influence of interindividual traits, movement similarity, and predictability on enjoyment. We used a hurdle-gaussian model to calculate the likelihood of very low enjoyment (ratings <11) for each trait, as well as the relationships between traits and ratings of enjoyment per se (ratings 11-100) in a single model. No model comparison using LOO (leave-one-out cross-validation) possible, as the *hurdle\_gaussian* custom family from Andrew Heiss' tutorial (<https://www.andrewheiss.com/blog/2022/05/09/hurdle-lognormal-gaussian-brms/>) has yet to be integrated into the *brms* package. Our final model was:

```
Expl.17: enjoyment_H ~ 1 + M_entropy1_z + M_similarity1_z + extraversion_z + selfEsteem_z + bpq_z + bcq_z + iri_z + cati_z + (1|ID), hu ~ 1 + M_entropy1_z + M_similarity1_z + extraversion_z + selfEsteem_z + bpq_z + bcq_z + iri_z + cati_z
```

Enjoyment\_H = enjoyment, where all ratings <11 out of 100 are replaced with 0

M\_entropy1\_z = z-scored and averaged entropy of right and left wrists

M\_similarity\_z = z-scored and averaged similarity of movements

extraversion\_z = z-scored extraversion score

selfEsteem\_z = z-scored selfesteem score

bpq\_z = z-scored body perception score

bcq\_z = z-scored body competence score

iri\_z = z-scored empathy score

cati\_z = z-scored autistic trait score

hu = the intercept representing the likelihood of very low enjoyment (ratings <11 out of 100)



**Supplementary Figure F) Influence of interindividual traits, enjoyment, reproducibility, and predictability (entropy) on enjoyment: Hu (very low enjoyment, i.e., ratings of enjoyment that were <11 out of 100) parameter estimates from Exp1.17.**

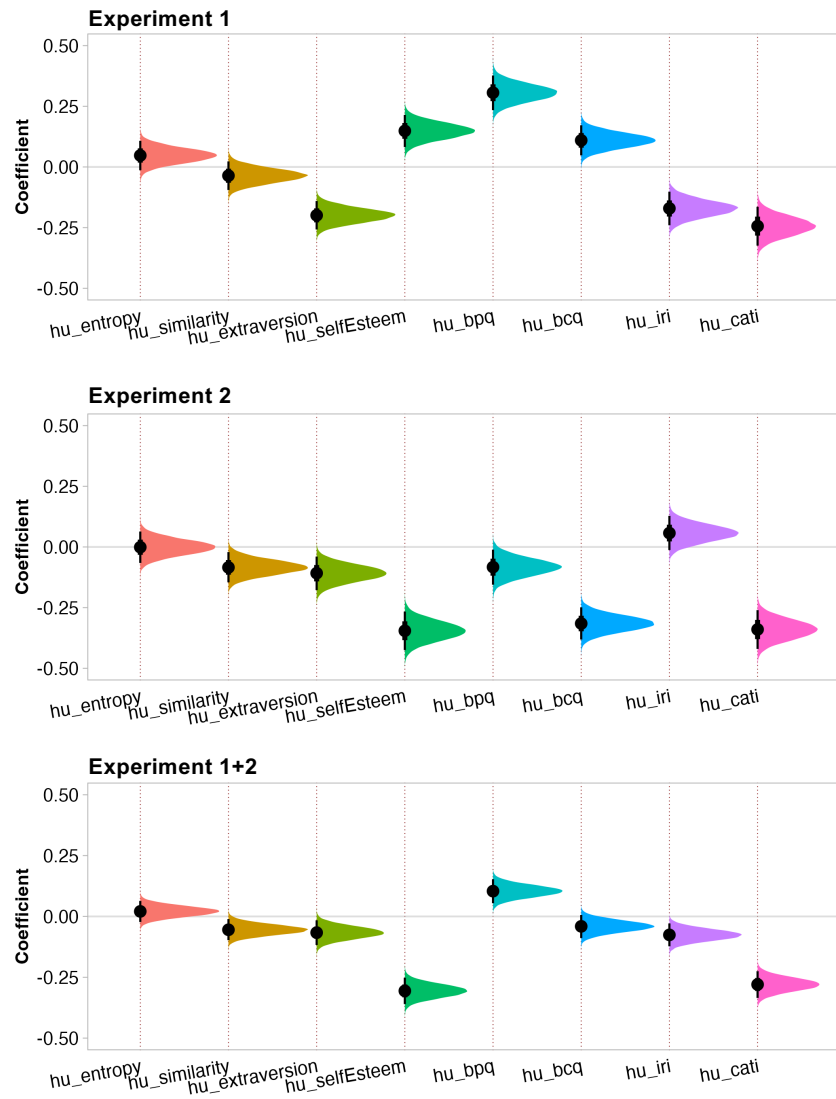

**Supplementary Figure G)** Influence of interindividual traits, movement similarity, and predictability (entropy) on enjoyment: Mu (enjoyment per se, i.e., rating between 11-100) parameter estimates from Exp1.17.

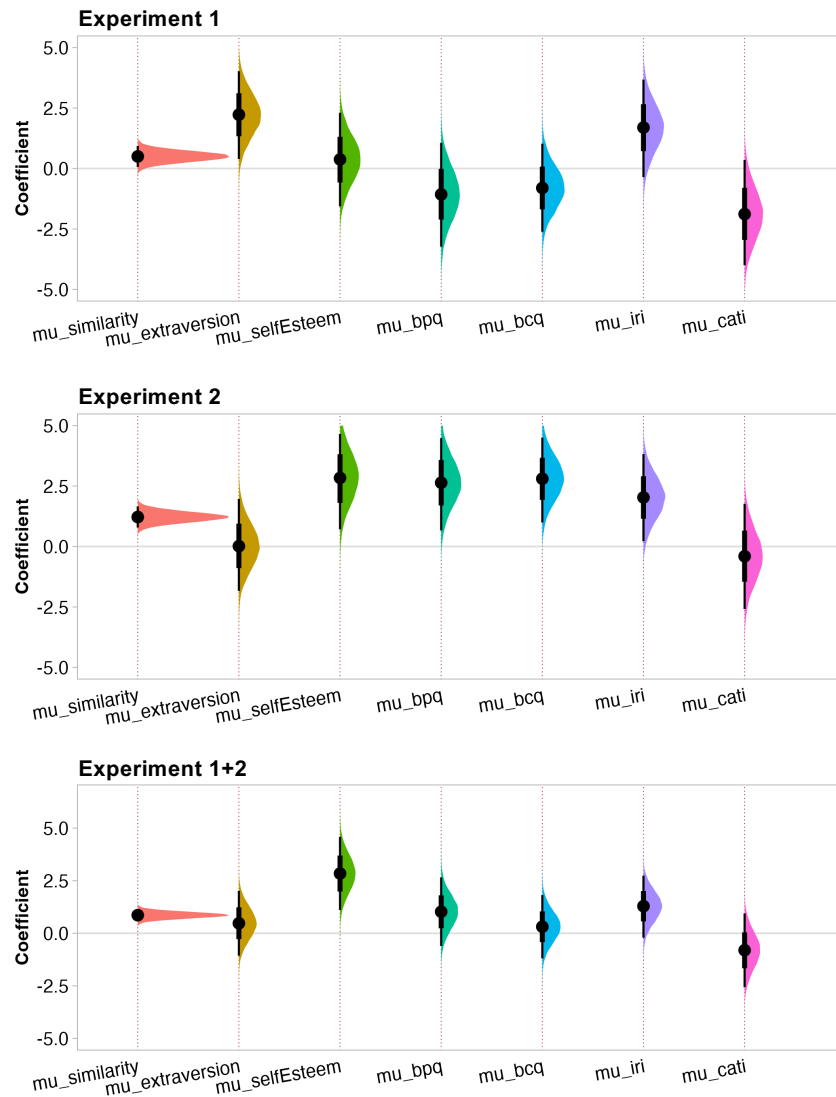

Supplement: 41598_2024_53191_MOESM1_ESM.pdf [file 41598_2024_53191_MOESM1_ESM.pdf]
